# Supplementary material for: Targeted metabolomics approach for identification of relapsing–remitting multiple sclerosis markers and evaluation of diagnostic models
Source: Royal Society of Chemistry journal article supplement (doi:10.1039/c9md00253g), 2019-01-01
Supplement: c9md00253g5.xlsx [file c9md00253g5.xlsx]

## Sheet: Sheet 1
Comp.Name	statistic	p.value
Leucine	334	0.0307378
Glutamic Acid	154	0.0391141
Valine	327	0.0465721
C10:1-Carnitine	327	0.0465721
C5-Carnitine	322	0.0615771
Tyrosine	321	0.0650036
C18-Carnitine	316	0.0845094
C3-Carnitine	315	0.0889167
Proline	310	0.11373
C10-Carnitine	309	0.119279
C14:1-Carnitine	304	0.150181
C18OH-Carnitine	304	0.150181
C8-Carnitine	304	0.150181
C18:2OH-Carnitine	303	0.155508
C4-Carnitine	303	0.157021
C6-Carnitine	302	0.16409
C12-Carnitine	300	0.178925
Aspartic acid	192	0.248017
C16:1-Carnitine	288	0.28866
Citrulline	286	0.310543
C4OH-Carnitine	286	0.310543
C2-Carnitine	282	0.357437
Phenylalanine	277	0.421852
C3DC-Carnitine	208	0.431656
C16-Carnitine	275	0.449373
Arginine	271	0.507295
C8:1-Carnitine	215	0.533637
C14:2-Carnitine	216	0.54919
Alanine	217	0.568834
C18:1-Carnitine	265	0.600858
Carnitine	261	0.667175
C16OH-Carnitine	260	0.681124
C14-Carnitine	260	0.684187
Glycine	257	0.736142
Methionine	254	0.789307
Ornithine	230	0.789307
C5DC-Carnitine	249	0.87997
C5OH-Carnitine	241	0.990733
C4DC-Carnitine	241	0.990733
