# Supplementary material for: Targeted metabolomics approach for identification of relapsing–remitting multiple sclerosis markers and evaluation of diagnostic models
Source: Royal Society of Chemistry journal article supplement (doi:10.1039/c9md00253g), 2019-01-01
Supplement: c9md00253g6.xlsx [file c9md00253g6.xlsx]

## Sheet: Sheet 1
Component.Name
