# Supplementary material for: Targeted metabolomics approach for identification of relapsing–remitting multiple sclerosis markers and evaluation of diagnostic models
Source: Royal Society of Chemistry journal article supplement (doi:10.1039/c9md00253g), 2019-01-01
Supplement: c9md00253g8.xlsx [file c9md00253g8.xlsx]

## Sheet: Лист1
RRMS cohort	№	Age	Sex	EDSS	Disease duration, years	Relapse state/ Remitting state	imaging data (lesion load)
1	1	22	F	2.5	3	relapse state	foci with contrast
2	3	32	M	4.5	4	relapse state	foci w/o contrast
3	5	22	F	1.5	0	relapse state	foci with contrast
4	7	30	F	4	3	relapse state	foci w/o contrast
5	8	35	F	4	7	relapse state	foci with contrast
6	9	35	F	7.5	0	relapse state	foci with contrast
7	10	22	F	1.5	0	relapse state	foci with contrast
8	11	28	F	1.5	5	relapse state	foci w/o contrast
9	15	37	F	4	5	relapse state	foci with contrast
10	16	28	F	2	0	relapse state	foci with contrast
11	17	37	F	2	6	relapse state	foci with contrast
12	19	22	F	1.5	3	relapse state	foci with contrast
13	22	30	F	8	10	relapse state	foci with contrast
14	23	22	F	2	0	relapse state	foci with contrast
15	27	34	F	3	5	relapse state	foci w/o contrast
16	32	25	F	3	5	relapse state	foci with contrast
17	33	25	F	7	5	relapse state	foci with contrast
18	37	32	F	3	2	relapse state	foci with contrast
19	42	30	F	6	0	relapse state	w/o foci CIS
20	43	28	M	1	0	relapse state	foci with contrast
21	45	31	F	2.5	8	relapse state	w/o foci CIS
22	46	28	F	2.5	0	relapse state	foci with contrast
	Average	28.9048	5.02655
Control group
1	1	24	F
2	2	23	F
3	3	23	F
4	4	23	F
5	5	23	F
6	6	23	F
7	7	23	F
8	8	24	F
9	9	24	F
10	10	24	F
11	11	34	F
12	12	36	F
13	13	27	F
14	14	37	F
15	15	32	F
16	16	38	F
17	17	35	F
18	18	33	M
19	19	36	M
20	20	31	F
21	21	27	F
22	22	30	F
	Average	28.6364	5.58523
