# Supplementary figures and images for: Targeted metabolomics approach for identification of relapsing–remitting multiple sclerosis markers and evaluation of diagnostic models
Source: Royal Society of Chemistry journal article supplement (doi:10.1039/c9md00253g), 2019-01-01

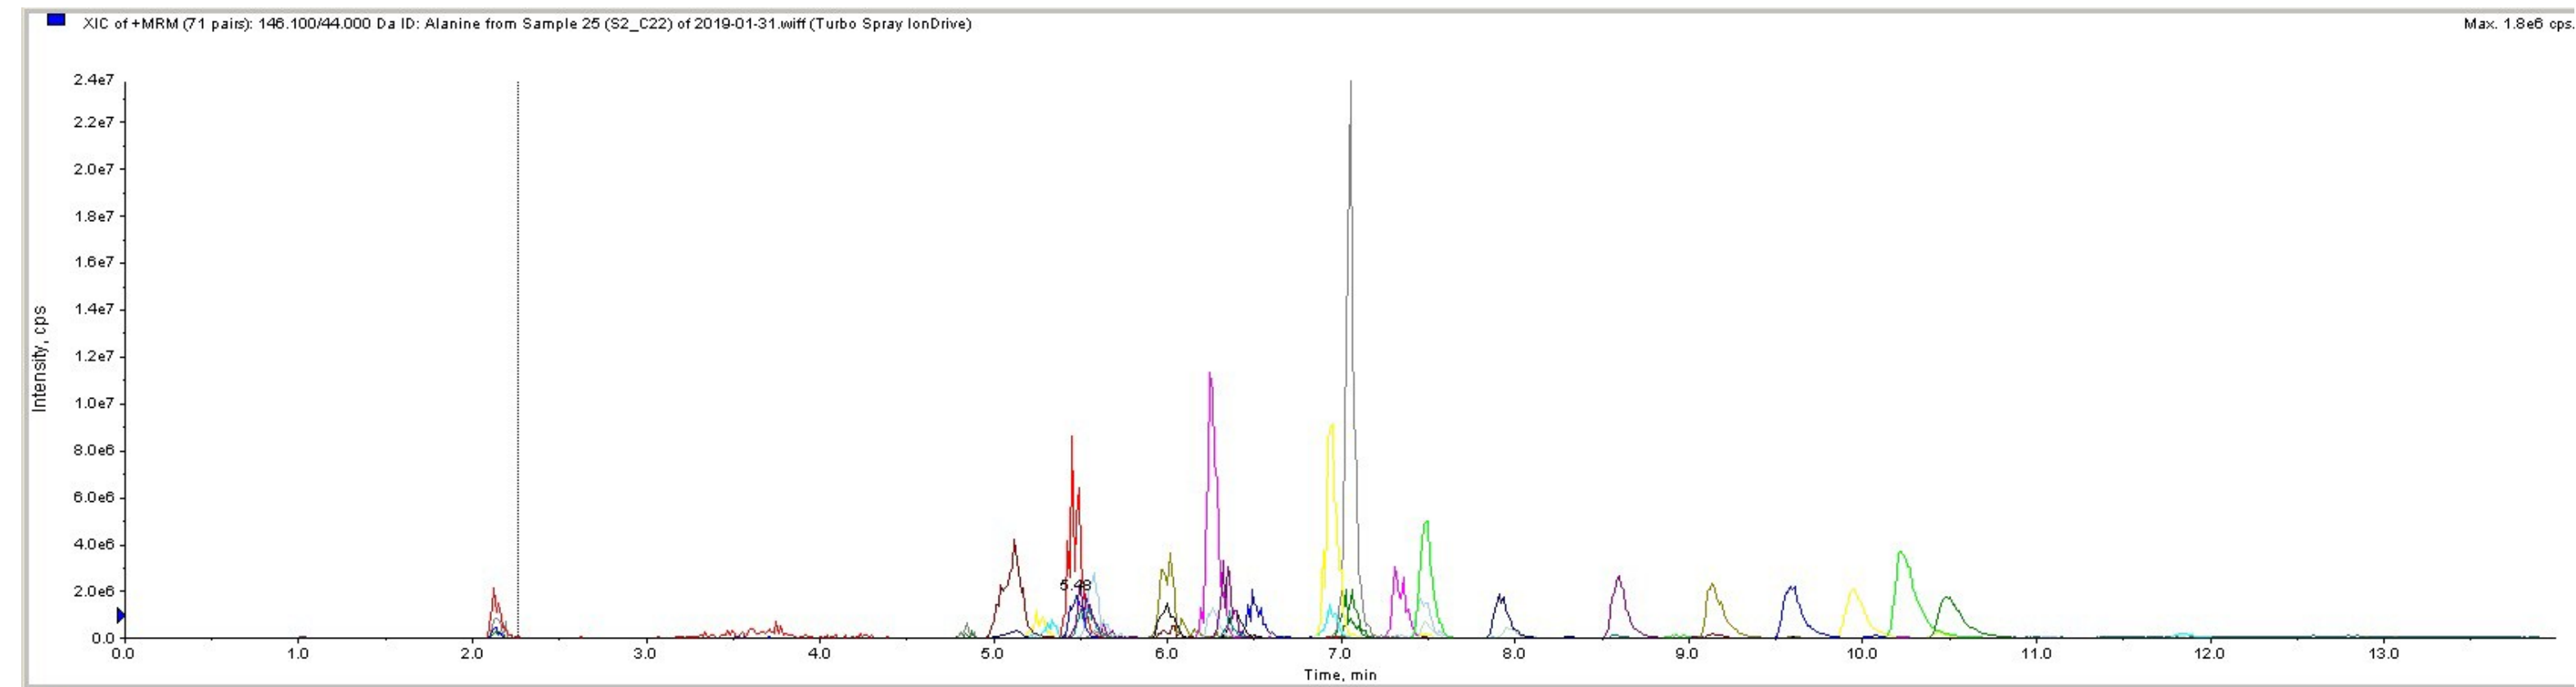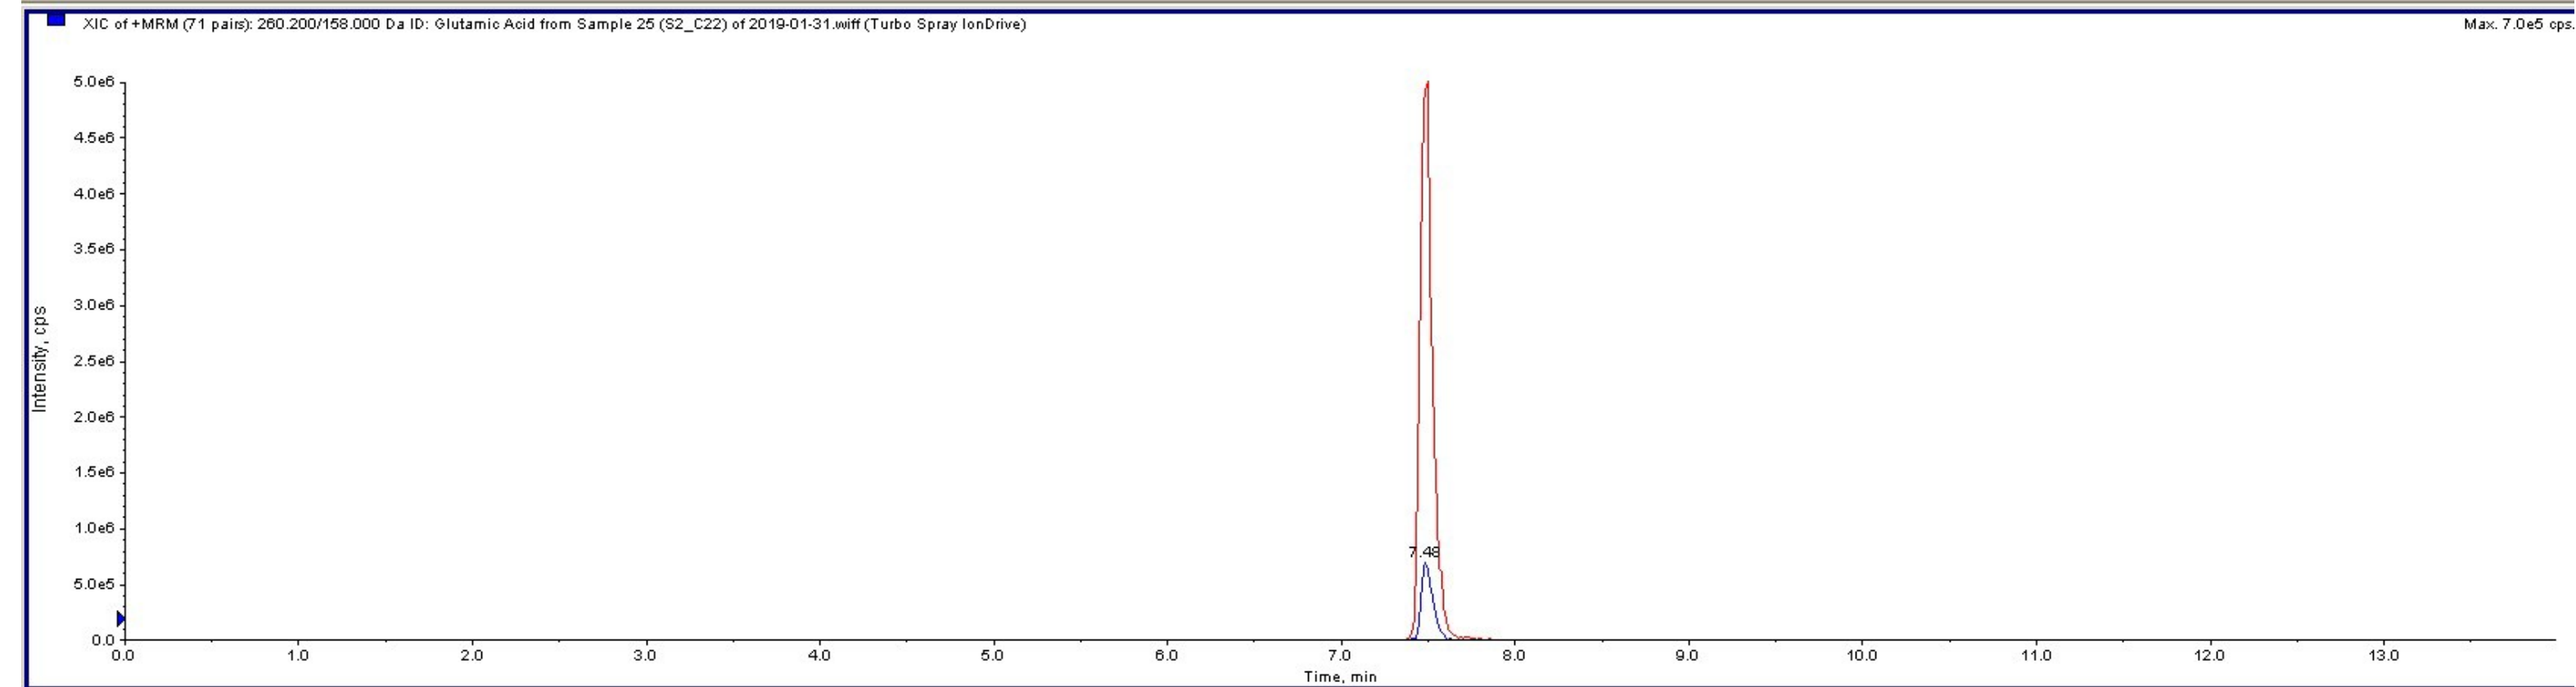

Supplement: c9md00253g2.pdf [file c9md00253g2.pdf]

# Eigenvalue distribution

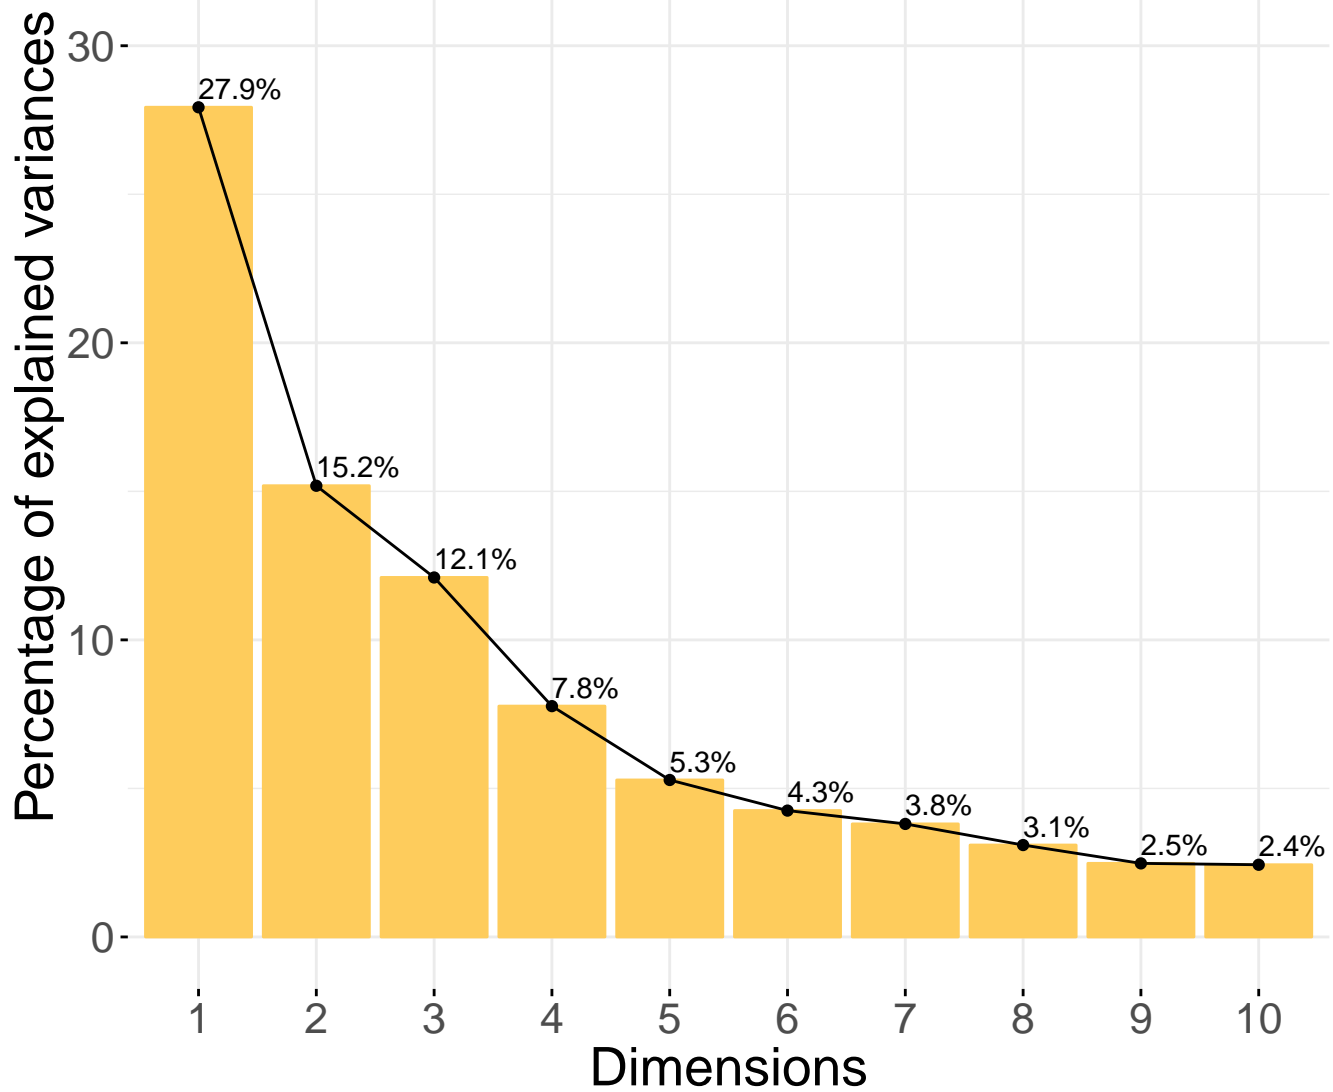

Supplement: c9md00253g3.pdf [file c9md00253g3.pdf]

### Random forest model tuning in cross-validation

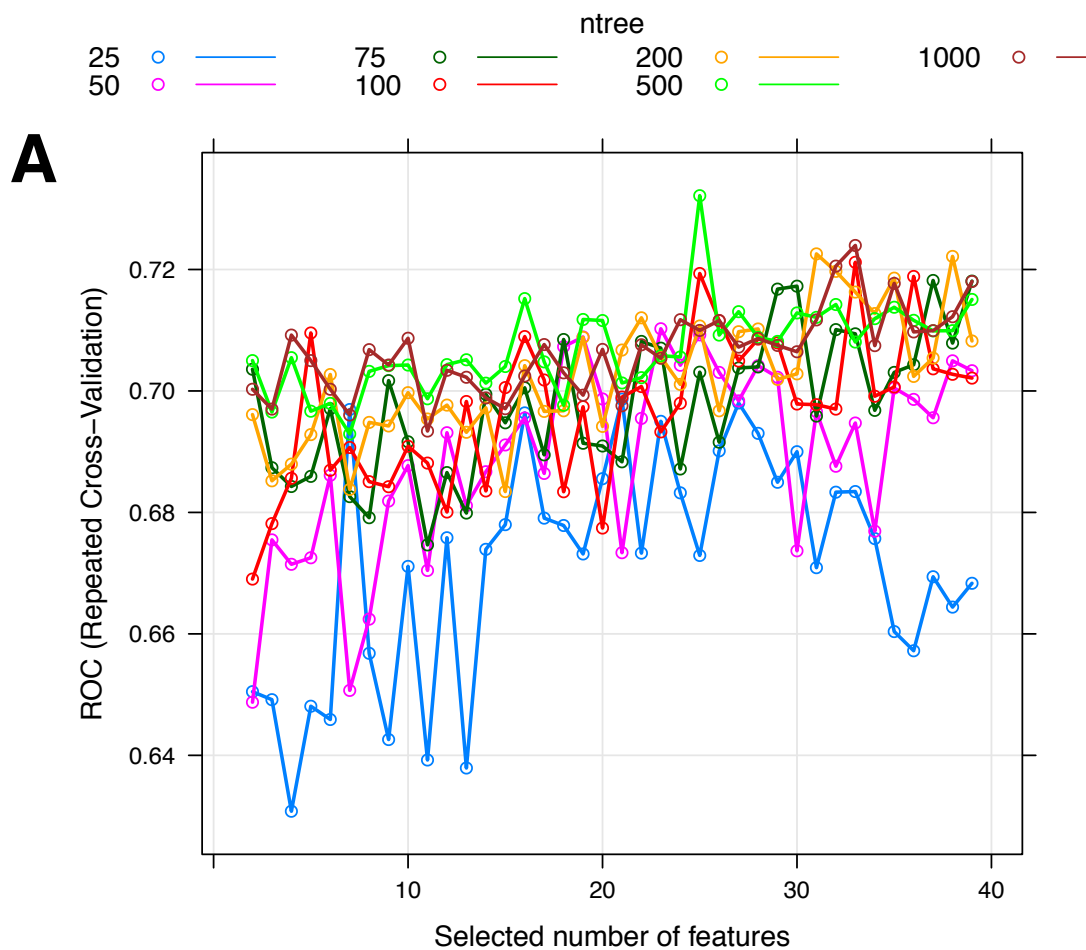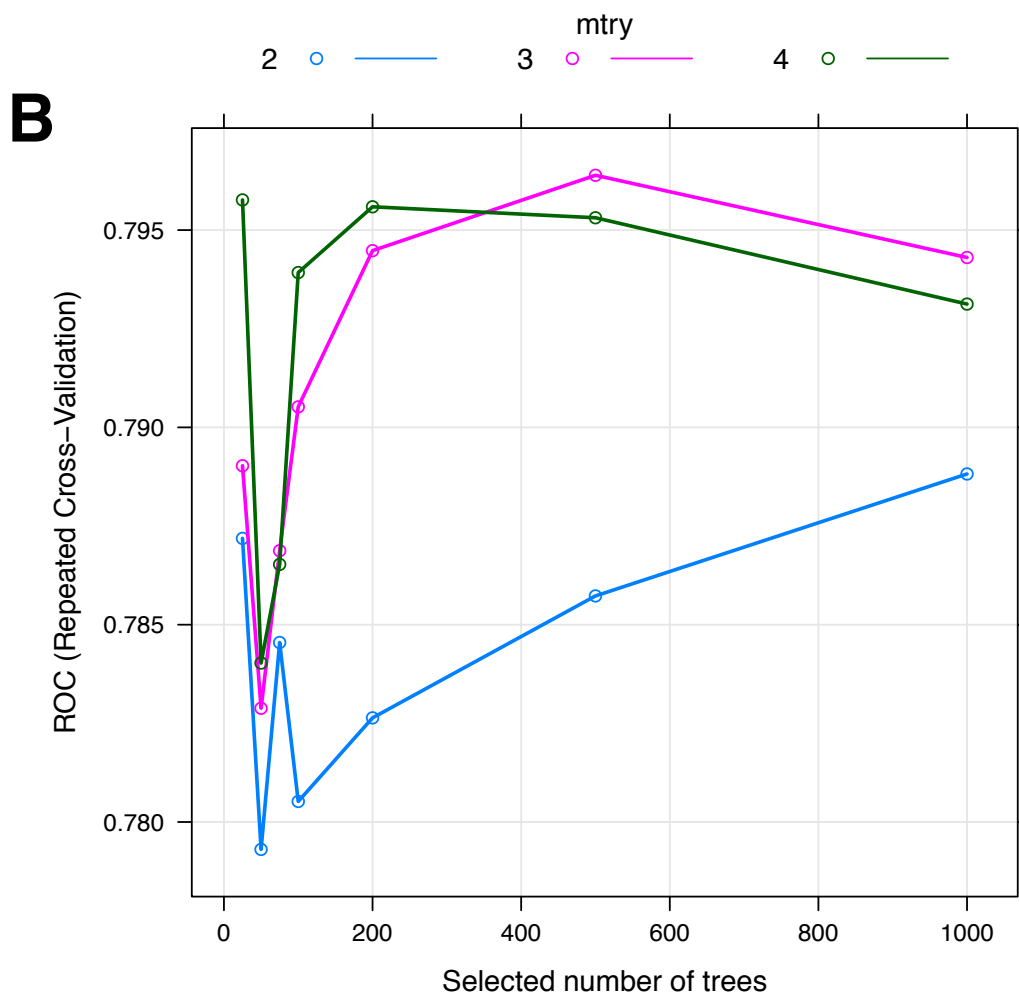

Supplement: c9md00253g4.pdf [file c9md00253g4.pdf]
